Published by  
**THE AMERICAN  
 SOCIETY FOR  
 CELL  
 BIOLOGY**  
*The science of life, the life of science*

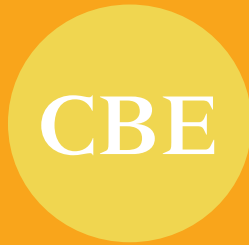

# Life Sciences Education

SimUText

Evolutionary Evidence    Select an Exercise: **Evolving Lizards**    My Work    Help    Library    Home

LAB NOTEBOOK

TAIL CREST  
DEWLAP  
FRILL

HORN'S  
HEAD CREST  
BACK CREST  
STRIPES  
SPOTS

ISLAND VIEW

ISLAND 1    ISLAND 2    ISLAND 3    ISLAND 4    ISLAND 5

HIDE

Controls    Year: 67    Tools    Fossil Record    OPEN ▲

GO    STEP    STOP    RESET

This tool is not yet available.

# Evolution Education Tools
