# Table of Contents

## FEATURES

### *Approaches to Biology Teaching and Learning* Promoting Student Metacognition

Kimberly D. Tanner . . . . . 113–120

### *From the National Academies*

### Changing and Evolving Relationships between Two- and Four-Year Colleges and Universities: They're Not Your Parents' Community Colleges Anymore

Jay B. Labov . . . . . 121–128

### *WWW.Life Sciences Education*

### Science Denial and the Science Classroom

Dennis W. C. Liu . . . . . 129–134

### *Book Review*

### Dynamic Classes and Eager Students

Laura L. Carruth . . . . . 135–136

### *Book Review*

### RNA Royale

José Vázquez . . . . . 137–138

### *Book Review*

### Bring Your Self to Work Day—Every Day

Shari L. Britner . . . . . 139–141

## ARTICLES

### Are Africans, Europeans, and Asians Different “Races”? A Guided-Inquiry Lab for Introducing Undergraduate Students to Genetic Diversity and Preparing Them to Study Natural Selection

Steven T. Kalinowski, Tessa M. Andrews, Mary J. Leonard, and Meagan Snodgrass . . . . . 142–151

### Short Lesson Plan Associated with Increased Acceptance of Evolutionary Theory and Potential Change in Three Alternate Conceptions of Macroevolution in Undergraduate Students

Joel K. Abraham, Kathryn E. Perez, Nicholas Downey, Jon C. Herron, and Eli Meir . . . . . 152–164

### Studying Human Disease Genes in *Caenorhabditis elegans*: A Molecular Genetics Laboratory Project

Elisabeth A. Cox-Paulson, Theresa M. Grana, Michelle A. Harris, and Janet M. Batzli . . . . . 165–179

### A Simple Microscopy Assay to Teach the Processes of Phagocytosis and Exocytosis

Ross Gray, Andrew Gray, Jessica L. Fite, Renée Jordan, Sarah Stark, and Kari Naylor . . . . . 180–186

### Does Instructor Type Matter? Undergraduate Student Perception of Graduate Teaching Assistants and Professors

K. Denise Kendall and Elisabeth E. Schussler . . . . . 187–199

### *On the Cover*

Despite numerous developments in evolution education practices and tools, many undergraduates still have difficulty understanding and applying evolutionary concepts or reject evolutionary theory. A study by Joel K. Abraham and colleagues (see page 152) identified some of the alternate conceptions undergraduates have about macroevolutionary processes, and measured the effect of a short lesson on student conceptions and acceptance of evolutionary theory. During the lesson, students manipulate traits of simulated lizards and compare the distribution of shared traits in two situations: evolution with descent by modification, and independent creation. They use these trait distributions to make and test predictions about the fossil record. Cover shows one exercise in the computer-based implementation of the lesson, Evolutionary Evidence, from SimBio Virtual Labs ([www.simbio.com](http://www.simbio.com)).
